# Supplementary material
Source: publisher site journal article supplement (https://www.dovepress.com/article/265470)
Supplement: Supplementary file 1 [file get_supplementary_file.php]

**SUPPLEMENTARY DATA**

**Table S 1- Study design and visits**

|  | **V0 (-3 months)** | **V1 (baseline)** | **V2 (3 months)** |
| --- | --- | --- | --- |
| **Informed consent** | x |  |  |
| **Inclusion & exclusion criteria** | x |  |  |
| **Device training** | x |  |  |
| **COPD history and evaluation** | x |  |  |
| **Spirometry** | x |  |  |
| **6 minutes walking test** | x |  |  |
| **COPD indexes (BODE, BODEx, COTE)** | x |  |  |
| **EQ5D-5L** | x |  | x |
| **CAT questionnaire** | x | x | x |
| **E-RS diary** | x | x | x |
| **Impact assessment** | x | x | x |
| **Stability assessment** |  | x | x |
| **Control status** |  | x | x |
| **Adverse events** |  | x | x |

**Table S 2- EQ5D-5L scores among controlled and non controlled males patients at V1 either by CAT criteria (up) or Clinical criteria (down)**

| **CAT CRITERIA** |  | **V0** | **P value** | **V2** | **P value** |
| --- | --- | --- | --- | --- | --- |
| **EQ5D- 5L** | **Controlled** | 0.83±0.18 | 0.004 | 0.83±0.17 | 0.023 |
| **Not controlled** | 0.72± 0.12 | 0.73± 0.21 |
| **EQ5D VAS** | **Controlled** | 68.3±23.4 | 0.390 | 70.3±25.5 | 0.376 |
| **Not controlled** | 62.6±24.6 | 61.8± 23.7 |

| **CLINICAL CRITERIA** |  | **V0** | **P value** | **V2** | **P value** |
| --- | --- | --- | --- | --- | --- |
| **EQ5D- 5L** | **Controlled** | 0.82±0.10 | 0.005 | 0.81±0.15 | 0.027 |
| **Not controlled** | 0.74± 0.23 | 0.71± 0.21 |
| **EQ5D VAS** | **Controlled** | 65.3±26.3 | 0.621 | 67.8±25.5 | 0.531 |
| **Not controlled** | 61.8±23.4 | 62.4± 22.6 |

**Table S 3- EQ5D-5L scores among controlled and non controlled female patients at V1 either by CAT criteria (up) or Clinical criteria (down)**

| **CAT CRITERIA** |  | **V0** | **P value** | **V2** | **P value** |
| --- | --- | --- | --- | --- | --- |
| **EQ5D- 5L** | **Controlled** | 0.77±0.19 | 0.441 | 0.76±0.13 | 0.4.24 |
| **Not controlled** | 0.64± 0.31 | 0.65± 0.26 |
| **EQ5D VAS** | **Controlled** | 62.4±43.2 | 0.878 | 64.1±38.6 | 0.442 |
| **Not controlled** | 57.0±34.8 | 54.7± 34.2 |

| **CLINICAL CRITERIA** |  | **V0** | **P value** | **V2** | **P value** |
| --- | --- | --- | --- | --- | --- |
| **EQ5D- 5L** | **Controlled** | 0.77±0.28 | 0.769 | 0.78±0.23 | 0.691 |
| **Not controlled** | 0.73± 0.26 | 0.73± 0.23 |
| **EQ5D VAS** | **Controlled** | 68.2±31.4 | 0.513 | 63.4±34.6 | 0.654 |
| **Not controlled** | 51.3±39.8 | 53.8±41.2 |
